# Supplementary material for: Evaluation of aptamer specificity with or without primers using clinical samples for C-reactive protein by magnetic-assisted rapid aptamer selection
Source: Royal Society of Chemistry journal article supplement (doi:10.1039/c7ra07249j), 2017-01-01

## **Electronic supplementary information**

### **Evaluation of Aptamer Specificity with or without Primers Using Clinical Samples for C-reactive Protein by Magnetic-Assisted Rapid Aptamer Selection**

Huan-Hao Li<sup>1</sup>, Chih-Yung Wen<sup>1</sup>, Chin-Yih Hong<sup>2</sup>, Ji-Ching Lai<sup>3, 4\*</sup>

<sup>1</sup> Department of Mechanical Engineering, Hong Kong Polytechnic University, Hong Kong Special Administrative Region

<sup>2</sup> Graduate Institute of Biomedical Engineering, National Chung Hsing University, Taichung, Taiwan

<sup>3</sup> Institute of Electro-optical Science and Technology, National Taiwan Normal University, Taipei, Taiwan

<sup>4</sup> Research Assistant Center, Show Chwan Memorial Hospital, Changhua, Taiwan

Huan-Hao Li, Chih-Yung Wen contributed equally to this work, and both should be considered as first authors.

\*Correspondence: Ji-Ching Lai

E-mail: jichinglai@gmail.com

Tel: 886-4-725-6166

### **Procedure for Self-synthesizing Forward Single Strand Aptamers**

For each plasmid picked from the cloning experiments, 10 ng of aptamer clone plasmid was used as a PCR template to generate double strand DNA (dsDNA) with 50N-LAB-S and Biotin-50N-LAB-AS primers. The PCR condition and procedure were as described in the main text. After the completion of PCR amplification, the PCR product was incubated with SA-MNPs, obtained by magnetic separation from 5  $\mu$ l of SA reagent. Forward single strand aptamers (non-biotinylated strand) were separated from the immobilized complementary strand, by being incubated with 0.15 N of fresh NaOH for 5 minutes. The bound SA-MNPs were removed with a magnetic stand. An equal amount of 0.15 N of HCl was added to the collected supernatant to adjust the final pH to 7.0, after which the forward ssDNA was precipitated with 1 ml of 100% ice-cold alcohol. The concentration of the single strand aptamers was determined with a NanoDrop 2000c spectrophotometer (Thermo Fisher Scientific, Wilmington, DE, USA). The self-synthesized aptamers were then used for the preliminary reverse validation.

Figure S1. Results of the preliminary reverse validation of self-synthesized aptamers, including candidate aptamers #1-6 (a) to (f), with positive control (CRP: P1) and negative controls (N1, N2, and N3). From the result, Candidate 1 and 2 were selected for further experiments and named as CRP-aptamer-1 and CRP-aptamer-2, respectively.

Figure S2. The secondary structure of selected aptamers. (a) CRP-aptamer-1 and (b) CRP-aptamer-2 predicted by MFold analysis

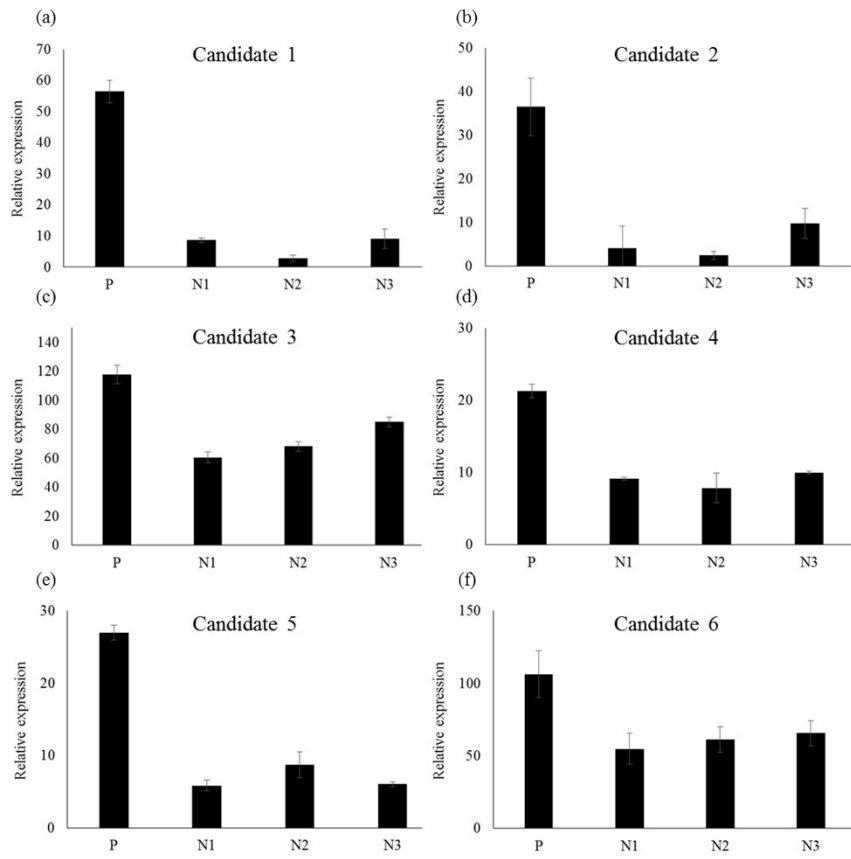

Supplement: c7ra07249j1.pdf [file c7ra07249j1.pdf]
